# Supplementary material for: Quantifying interdecadal changes in large-scale patterns of surface air temperature variability
Source: Copernicus journal article supplement (doi:10.5194/esd-2017-79), 2017-09-13
Supplement: Supplementary file [file esd-2017-79-AC1-supplement.pdf]

Anonymous Referee #1 says

- a) This methodology has some fatal flaws (please see the following major comments).
- b) I did not find the merit of the proposed methodology compared to other commonly used methods.
- c) The study is also contradicting the title of the manuscript.

As in the discussion stage authors are “invited to take an active role in the debate by posting author comments as a response to referee comments and short comments of the scientific community as soon as possible” we aim to contribute to the discussion by addressing each of these points.

Regarding point (a) the Referee says “*The methodology proposed in the manuscript has some fatal flaws: (1) The period of decadal- or interdecadal-scale climate variability is not necessarily equal to ten years in nature. It may vary in a very large range. The phase may be different at different geographic locations. For example, Pacific Decadal Oscillation (PDO) and Atlantic Multidecadal Oscillation (AMO) are very significant decadal and multidecadal variabilities in climate system. They have very different periods and geographic locations.*”

Of course, we agree with the referee in his/her comment that climate variability has different periods, in different geographic locations. However, this does not mean that the “*methodology proposed in the manuscript has some fatal flaws*”. In our manuscript, we don’t refer to (or claim to analyze) “*The period of decadal- or interdecadal-scale climate variability*” as clearly such a period cannot be analyzed with SAT time-series that cover only 36 years (as in our manuscript). Regarding the phase of PDO and AMO, we remark that we also do not refer to them in our manuscript because, as we just said, we cannot analyze such phenomena (with decadal or longer time-scale) with only 36 year of data.

Regarding the methodology used, Hilbert analysis, we remark that is well established, and can be applied to signals that have a well-defined periodicity (in our case, SAT data which has a characteristic period of one year).

The reviewer says “*Therefore, it is inappropriate that the authors compare the data between two fixed time periods, i.e. 1979-1988 and 2007-2016, when quantifying the interdecadal changes of SAT*”.

It seems to us that the key word “interdecadal” must have been misleading to the reviewer. In our manuscript, we compare variations in average magnitudes (and their standard deviations) between the first ten years and the last ten years of the dataset. We cannot think of a single argument by which this could be “inappropriate” or have “some fatal flaws”. Moreover, in a revised version of the manuscript we can add several references where a similar comparison (between two ten-year periods) is performed.

We could also compare the first and last five years of the dataset (i.e. 1979-1983 and 2002-2016), or we could compare the first half and the last half of the data set (i.e. 1979-1999 and 2000-2016). There is nothing intrinsically wrong in doing that, and moreover, we show in our manuscript that some interesting and relevant conclusions can be extracted from such analysis.

The reviewer says “*In terms of the extraction of climate variability, a successful signal processing method, e.g. FFT, wavelet transform, should be able to automatically detect the amplitude, period, and phase of a time series at various time scales*”.

We fully agree with this comment but that is not scope of our work, as we aim to detect *instantaneous* amplitude, frequency and phase. To the best of our knowledge, only the Hilbert transform can provide, for each data value,  $x(t)$ , in a time-series, an instantaneous amplitude,  $a(t)$ , frequency,  $f(t)$  and phase,  $\phi(t)$ .

The reviewer says "*The author proposed method includes signals at all time scales and does not filter out the interdecadal variability. In this respect, I do not see the merit of the method proposed in the manuscript.*"

A main point in our manuscript is that we demonstrate that meaningful information can be extracted from the raw data, without making any a priori assumption, i.e., without the need to filter the data (we preprocess the data just by de-trending and normalizing).

The reviewer says "*I noticed that the authors cited some literatures with regard to Hilbert-Huang transform (HHT). HHT, consisting of empirical mode decomposition (EMD) and Hilbert spectral analysis, can provide a time-frequency-energy description of a time series, which has been used extensively in geophysical research. Why the authors only use Hilbert transform here?*"

Our aim is to show that a simple approach can indeed yield meaningful information. To keep the algorithm simple we have not used the HHT. However, we performed extensive tests to verify that the amplitude and the phase extracted were appropriated ( $x(t)=a(t) \cos[\phi(t)]$  for all  $t$  except during a transient first and final time-intervals that were disregarded). We also compared the results with different algorithms that implemented the Hilbert transform and different ways of computing the Hilbert phase. Moreover, in the *supplementary information* we compared two reanalysis and did not detect any "fatal flaws" or contradiction with well-known climate phenomena, to justify trying a more advanced method. In addition, in the *supplementary information* we also show that results of Hilbert analysis can be well-explained by a simple model (AR(1) process) which is commonly used as a null-hypothesis in climate studies.

Of course, this argument is valid for the analysis of SAT data that, as mentioned before, has a defined periodicity imposed by the annual solar cycle. The analysis of other climatological variables (lacking well defined periodicity) will likely need the use of more advanced tools, such as HHT.

The reviewer says "*In terms of the detection of interdecadal climate variability, are there any merits of the proposed methodology compared to the HHT?*"

As we explained before we limit the study to detect changes (in averaged quantities and standard deviations) between the first and last ten years of the dataset. In this sense, a main merit is that the algorithm, while being simple to implement, gives information which is consistent with information we extracted by other means (see next paragraph).

Regarding point (b): "*I did not find the merit of the proposed methodology*".

The reviewer says "*I personally do not think the authors present an effective method in identifying interdecadal climate variabilities. If the authors think they did, they have to clearly elucidate the merits of their approach beyond other data analysis methods.*"

In our manuscript we compare the results of Hilbert analysis with another data analysis method (as explained in section Methods, subsection 3.2). Specifically, we compare two approaches in Figs. 2(c) and 2(d), in Fig. 3(a) and 3(b) and in Fig. 4(c) and 4(d). In

all cases we have found consistent results. Regarding the merits of our approach, we note that Hilbert analysis detects stronger variations, and/or more clear (better defined) spatial patterns: the uncovered regions where variations are more pronounced are clearer –i.e., less noisy—with the Hilbert approach.

The reviewer says *“The introduction was not well written. There are many general sentences followed by a number of literature citations without going into details. For example, in P1 L16-19, “Data analysis tools commonly used for the study of complex system are successfully being used for climate data analysis (Huang and Wu, 2008; Ghil et al., 2011; Palus, 2014; Tsonis and Swanson, 2008; Donges et al., 2009; Fountailis et al., 2015; Tantet and Dijkstra, 2014)”. What data analysis methods or tools do the authors refer to here? What is the strength and shortcoming of various methods? These general sentences barely provided any useful information to readers.”*

The goal of this sentence was to provide the reader with a non-exhaustive list of relevant references; however, we agree with the reviewer that the information provided is barely useful and we will be happy to expand and improve the introduction in a revised version of the manuscript.

The reviewer says *“The significance test proposed by the authors lacks mathematical basis. What is the significance level? The determination of significance threshold seems arbitrary. Why 2sigma is chosen?”*

It seems to us that the reviewer did not notice that this manuscript is accompanied by *supplementary information* where we show how the significance threshold modifies the obtained maps (Fig. 2 of the SI presents results with no threshold, 2sigma and 4 sigma). We will be happy to move this information to the main manuscript in a revised version. We will also be happy to expand this section to further discuss the appropriateness of the significance test done.

Regarding point (c): *The study is also contradicting the title of the manuscript.*

The reviewer says *“The title of manuscript includes two key words, “interdecadal changes” and “large-scale” patterns”. However, as I previously explained, it is inappropriate to measure the interdecadal changes in SAT with the difference between two fixed periods. The interdecadal changes of SAT presented in the study are misleading due to the methodology.*

In the context of our work, “interdecadal” refers to changes in the last decade with respect to the first decade of the reanalysis. While we believe that it is correct to refer to such changes as “interdecadal”, for the sake of clarity we will be happy to modify the wording in the title and in the text in a revised version. We suggest the following title, which more clearly reflects the content of the manuscript: *Quantifying changes in surface air temperature dynamics over several decades.*

The reviewer says *“On the other hand, the manuscript focuses on some specific spots, e.g. the spots located in Arctic and Amazonia. This is not large-scale pattern of SAT. Therefore, the research contradicts the title of the manuscript. The authors could consider focusing on the large-scale patterns of SAT, e.g. the PDO- or AMO-related SST pattern.”*

In the context of our work, “large-scale pattern” refers to spatial patterns, which are well-defined geographical regions where we uncover large changes in Hilbert

magnitudes (averaged amplitude, averaged frequency, and the standard deviations). As we said before, we don't mention PDO or AMO in our manuscript. Again for the sake of clarity, we will be happy to modify the wording in the title and in the text of a revised manuscript.

*However, I do not see very clear PDO- or AMO-like SAT pattern from the figures, which is probably due to the inappropriate approach employed, i.e. using the difference between two fixed periods. For example, no clear difference in PDO-like SAT pattern can be found if both periods (1979-1988 and 2007-2016) were in the positive phase of PDO. Under such circumstance, the conclusion of no PDO-like decadal variability would be clearly wrong."*

As we said before, we do not study changes of (we don't refer to and we do not make any conclusion of) PDO or AMO. We are convinced that the key words "inter-decadal changes" and "large-scale patterns" lead the reviewer to a misunderstanding /misinterpretation of our work and results. For the sake of clarity we will be happy to change these key words in the title and in the text of a revised manuscript.

The reviewer says *"The explanations on the reasons of interdecadal changes in SAT daily time series are vague and hand waving. I'm not saying the explanations are wrong but lack of in-depth analysis and evidence. Some explanations do not even match the results shown in the figures. For example, figure 1 shows a clear increase in the amplitude of SAT time series. The authors argue that the increase in the amplitude of SAT series is linked to the decrease in precipitation. The decrease in precipitation in turn leads to an increase in SAT due to changes in energy partition between latent heat and sensible heat (P4, L12-16). Assume this is correct, but it only explains the increase in SAT rather than the increase in the "amplitude" of SAT."*

Our work is aimed at i) proposing a new method to study climatic variations as those shown in Fig. 1, and ii) using this method to detect the geographical regions where such variations are more pronounced. To confirm the robustness of our results in the supplementary information we compare two reanalysis dataset. We see that the results are consistent; however, also some differences are detected and discussed. While we would like to provide more "in-deep" explanations of the changes uncovered, unfortunately this is not always possible and that is why the explanations might seem "vague and hand waving". We can of course try to improve the interpretation of our findings, however, we remark that the main goals of our work are to propose a new methodology and to identify the regions where the changes are more pronounced. We hope that our results will motivate further investigations to understand the reasons that underlie the uncovered large variations.

We disagree with *"Some explanations do not even match the results shown in the figures."* In particular, in the example mentioned by the reviewer, both time series confirm the changes detected by Hilbert amplitude, and the explanation provided match the increase in the amplitude of SAT annual oscillation: because precipitation in the Amazonas has annual periodicity, the decrease of the amplitude of the precipitation cycle is likely to produce an increase in the amplitude of SAT cycle.

The reviewer says *"The conclusion section did not well summarize the main findings. In my point of view, the key point of the manuscript is the method proposed to identify climate variability using Hilbert transform. However the short conclusion section barely summarizes the method."*

We agree with the reviewer that a key point of the manuscript is the method proposed (to identify changes in SAT dynamics that occur over several decades), and in a revised version we will be happy to further stress this point in the conclusions.

The reviewer says "*What does the "confirm this migration in the XX century" mean in P8, L2?*"

In our manuscript some specific changes detected in Hilbert frequency are interpreted as due to a northward migration and enlargement of the inter-tropical convergence zone (P5, paragraph that starts in L9), a discussion that the reviewer does not seem to have noticed. We agree however that this sentence in the conclusion is unclear and we will be happy to change the wording in a revised manuscript.
